# Supplementary material for: DCA Protects against Oxidation Injury Attributed to Cerebral Ischemia-Reperfusion by Regulating Glycolysis through PDK2-PDH-Nrf2 Axis
Source: PubMed Central journal article supplement (PMC8548159; doi:10.1155/2021/5173035), 2021-10-19

H/R+DCA mM

Sham

H/R

DCA

ML385

ROS

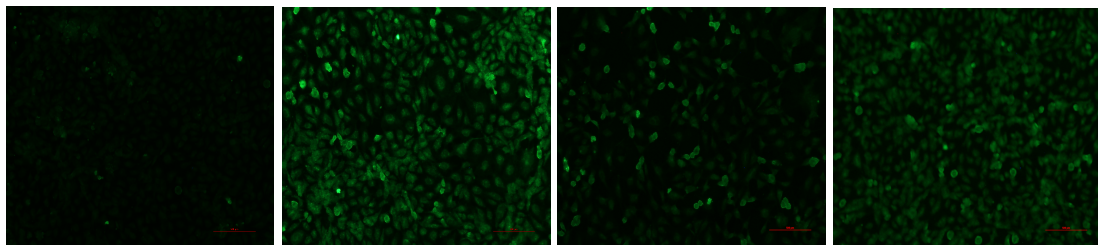

(a)

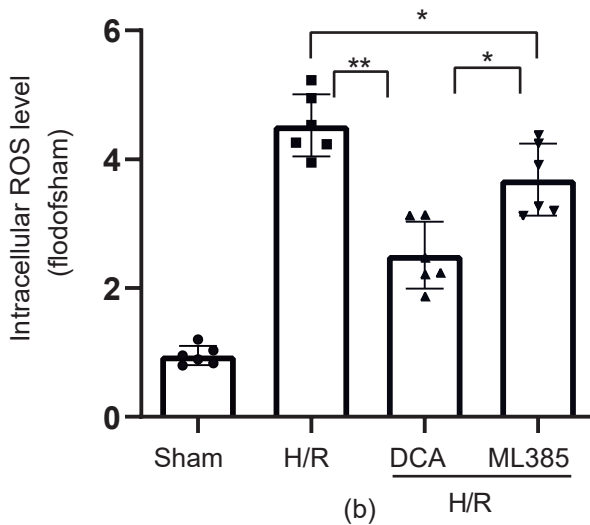

Supplement: 5173035.f1.pdf [file 5173035.f1.pdf]
